# Supplementary material for: Bempedoic Acid Restores Liver H2S Production in a Female Sprague-Dawley Rat Dietary Model of Non-Alcoholic Fatty Liver
Source: MDPI journal article supplement (doi:10.3390/ijms24010473), 2022-12-28
Supplement: s1 [file s1]

**Table S1: Primers used for RT-PCR**

| <i>Gen</i>     | <i>GenBank™</i> n° | <i>Primer sequences</i>                                                               | <i>PCR product</i> |
|----------------|--------------------|---------------------------------------------------------------------------------------|--------------------|
| <i>Abcg5</i>   | NM_053754.2        | Forward 5'-CGCAGGAACCGCATTGTAA-3'<br>Reverse 5'-TGTCGAAGTGGTGGGAAGAGCT-3'             | 68 bp              |
| <i>β-Actin</i> | NM_031144.3        | Forward 5'-GGCCCGAGTTGATTGACTAT-3'<br>Reverse 5'-CATCCAGCATCTTTGGAATG-3'              | 111bp              |
| <i>Cbs</i>     | NM_012522.2        | Forward 5'-GTTTGGTGTGTGTCACCGCCATTGA-3'<br>Reverse 5'-CCCTCCTAACGCTCAGCTCCCTAT-3'     | 206 bp             |
| <i>Cse</i>     | NM_017074.2        | Forward 5'-GTATGGAGGCACCAACAGGT-3'<br>Reverse 5'-GTTGGGTTTGTGGGTGTTTC-3'              | 150 bp             |
| <i>Cyp7a1</i>  | NM_012942.2        | Forward 5'-TACCTGCAAACCTGATGGGGAA-3'<br>Reverse 5'-GCTTCTGTGTCCAAATGCCTTC-3'          | 139 bp             |
| <i>Cyp27a1</i> | NM_178847.3        | Forward 5'-GGGGTAGACACGACATCCAA-3'<br>Reverse 5'-AGCTTTTAGCAGGGGCATGT-3'              | 159 bp             |
| <i>Cyp8b1</i>  | NM_031241.2        | Forward 5'-TTCCTCAACCCTGATGGCAC-3'<br>Reverse 5'-AGGGCATGTTGTAGTGGTGG-3'              | 76 bp              |
| <i>Mafg</i>    | NM_022386.3        | Forward 5'-GGCTCCCGCTTCACCTTTA-3'<br>Reverse 5'-GTGTGAGTGCCTGCTCACT-3'                | 83 bp              |
| <i>3mst</i>    | NM_138843.2        | Forward 5'-TTCATCAAGACCCACGAGGATA-3'<br>Reverse 5'-TTCAGTGAATGGGATGTTTACTGAG-3'       | 162 bp             |
| <i>Pgc1a</i>   | NM_031347.1        | Forward 5'-CAGAACAACCCCTGCCATTGTT-3'<br>Reverse 5'-GCTTTTGCTGTTGACAAATGCT-3'          | 77 bp              |
| <i>Rps29</i>   | NM_012876.1        | Forward 5'-TGAAGGCAAGATGGGTCAACCAGCAGC-3'<br>Reverse 5'-CAGGGTAGACAGTTGGTTTCATTGGG-3' | 236 bp             |
| <i>Shp</i>     | NM_057133.1        | Forward 5'-TGATGGCTCCCAAACCTCC-3'<br>Reverse 5'-AGGAATTCTGCCCTGAAGCA-3'               | 89 bp              |
| <i>Slc6a6</i>  | NM_017206.2        | Forward 5'-CCCTGACCTACAACAAAGTCTACCG-3'<br>Reverse 5'-GTTTCATGAGGGTTGCTCTGGAGTG-3'    | 233 bp             |

**Table S2. Antibodies used in western blot analysis.**

| <b>Antibody</b>                                    | <b>Reference Number</b>              |
|----------------------------------------------------|--------------------------------------|
| <b>CYP7A1 (E-10)</b>                               | Santa Cruz Biotechnology (sc-518007) |
| <b>FXR (H-130)</b>                                 | Santa Cruz Biotechnology (sc-13063)  |
| <b>mTOR (7C10)</b>                                 | Cell Signaling Technology (#2983)    |
| <b>p<sup>Ser2481</sup>mTOR</b>                     | Millipore (#09-343)                  |
| <b>PGC-1<math>\alpha</math></b>                    | Cayman (101707)                      |
| <b>p<sup>Ser571</sup>-PGC1 <math>\alpha</math></b> | R&Dsystems (AF6650)                  |
| <b>S6K1</b>                                        | Cell Signaling Technology (#9202)    |
| <b>p<sup>Thr389</sup>S6K1</b>                      | Cell Signaling Technology (#9205)    |
| <b>TBP</b>                                         | Sigma Aldrich (SAB4502926)           |
| <b>VINCULIN (7F9)</b>                              | Santa Cruz Biotechnology (sc-73614)  |
